# Supplementary material for: Gender on the Brain: A Case Study of Science Communication in the New Media Environment
Source: PubMed Central journal article supplement (PMC4212998; doi:10.1371/journal.pone.0110830), 2014-10-29
Supplement: pone.0110830.s001.pdf [file pone.0110830.s001.pdf]

### Traditional media articles included in the analysis

| ID | DATE     | ARTICLE TITLE                                                                                                                                                                         | PUBLICATION                           |
|----|----------|---------------------------------------------------------------------------------------------------------------------------------------------------------------------------------------|---------------------------------------|
| 1  | 30/12/13 | Sex-trapolation in the Latest Brain Science                                                                                                                                           | Huffington Post                       |
| 2  | 24/12/13 | Men, women's brains wired differently                                                                                                                                                 | Arab Times-Kuwait                     |
| 3  | 15/12/13 | Gender differences are hard-wired                                                                                                                                                     | News-Journal (Daytona Beach, Florida) |
| 4  | 14/12/13 | Brains wired differently in men and women                                                                                                                                             | Business Recorder                     |
| 5  | 14/12/13 | Time to ditch the "Venus and Mars" cliché                                                                                                                                             | The New Zealand Herald                |
| 6  | 13/12/13 | Let's talk about the gender differences that matter - in mental health                                                                                                                | The Guardian (London)                 |
| 7  | 13/12/13 | Do Men And Women Have Different Brains?                                                                                                                                               | National Public Radio                 |
| 8  | 12/12/13 | Women and men are wired differently                                                                                                                                                   | Daily News (South Africa)             |
| 9  | 12/12/13 | Men's and women's brains: the truth!;<br>As research proves the sexes' brains ARE wired differently, why women's are cleverer<br>ounce for ounce - and men can't read female feelings | Irish Daily Mail                      |
| 10 | 12/12/13 | CHICKEN OR EGG? NEW RESEARCH SHOWS MEN AND WOMEN'S BRAINS ARE<br>WIRED DIFFERENTLY                                                                                                    | States News Service                   |
| 11 | 12/12/13 | Man and women are different -- who woulda thought?                                                                                                                                    | Telegram & Gazette (Massachusetts)    |
| 12 | 11/12/13 | Why there is no such thing as the 'male brain'                                                                                                                                        | BRW                                   |
| 13 | 11/12/13 | Men and women wired differently, study uncovers                                                                                                                                       | Townsville Sun (Australia)            |
| 14 | 10/12/13 | Why men (still) don't do dishes                                                                                                                                                       | The Globe and Mail (Canada)           |
| 15 | 09/12/13 | WHOSE BRAIN IS BEST?                                                                                                                                                                  | The Sun (England)                     |
| 16 | 09/12/13 | Scientists get their brain wires crossed                                                                                                                                              | The Western Mail                      |
| 17 | 08/12/13 | Gender plays role in brain's wiring;<br>Mapping study suggests there are biological ties to male, female be-haviors                                                                   | The Baltimore Sun                     |
| 18 | 08/12/13 | Study: The Brains Of Men And Women Are Different...Very Different                                                                                                                     | Forbes Magazine                       |

|    |          |                                                                                                                                                                                                                                                                                                                                                                  |                                                   |
|----|----------|------------------------------------------------------------------------------------------------------------------------------------------------------------------------------------------------------------------------------------------------------------------------------------------------------------------------------------------------------------------|---------------------------------------------------|
| 19 | 08/12/13 | It's time for brain science finally to ditch the 'Venus and Mars' cliché: BACK TO FRONT?: SIDE TO SIDE?: Robin McKie, who was named science writer of the year at the British Journalism awards last week, explains why he is deeply sceptical of the latest reports on basic differences in the hard wiring of male and female brains: WHAT THE NEW STUDY SHOWS | The Observer (England)                            |
| 20 | 08/12/13 | -                                                                                                                                                                                                                                                                                                                                                                | Sunday Herald                                     |
| 21 | 07/12/13 | Boris missed the point on IQ - gifted children are failed by the system                                                                                                                                                                                                                                                                                          | The Guardian (London)                             |
| 22 | 07/12/13 | It's the truth, women really do multi-task better                                                                                                                                                                                                                                                                                                                | The Independent on Saturday (South Africa)        |
| 23 | 07/12/13 | Scientists are from Mars, journalists are from Venus                                                                                                                                                                                                                                                                                                             | The Irish Times                                   |
| 24 | 06/12/13 | Research Roundup, Dec. 6                                                                                                                                                                                                                                                                                                                                         | Daily Nebraskan: University of Nebraska-Lincoln   |
| 25 | 06/12/13 | Who's the Boss; Scientists at the University of Pennsylvania have stirred a hornet's nest.                                                                                                                                                                                                                                                                       | DNA                                               |
| 26 | 06/12/13 | It's official, my brain is not my own                                                                                                                                                                                                                                                                                                                            | The Herald (Glasgow)                              |
| 27 | 06/12/13 | Toy story; THE BIG READ Why should what children play with be segregated along gender lines? CLARE DWYER HOGG speaks to the parents fighting back                                                                                                                                                                                                                | The Independent (London)                          |
| 28 | 06/12/13 | Difference between men and women: brain structure                                                                                                                                                                                                                                                                                                                | Korea Times                                       |
| 29 | 06/12/13 | Sexes' grey area cleared up; The difference between male and female brains could explain why men are better at map reading and why women are better at remembering a conversation, writes Steve Connor                                                                                                                                                           | The Mercury (South Africa)                        |
| 30 | 06/12/13 | Perhaps it's time to reconsider the value of some respectful stereotypes                                                                                                                                                                                                                                                                                         | The Mercury (South Africa)                        |
| 31 | 06/12/13 | Leave the joined-up thinking to us, chaps                                                                                                                                                                                                                                                                                                                        | The Northern Echo                                 |
| 32 | 05/12/13 | So our wiring is different - that explains a lot of things                                                                                                                                                                                                                                                                                                       | Belfast Telegraph                                 |
| 33 | 05/12/13 | What? We're different? Well I never                                                                                                                                                                                                                                                                                                                              | Irish Independent                                 |
| 34 | 05/12/13 | Time of the woman                                                                                                                                                                                                                                                                                                                                                | The Mercury (South Africa)                        |
| 35 | 05/12/13 | Fix the TV and take out the garbage                                                                                                                                                                                                                                                                                                                              | National Post (f/k/a The Financial Post) (Canada) |
| 36 | 05/12/13 | Women wired to multitask                                                                                                                                                                                                                                                                                                                                         | Pretoria News (South Africa)                      |

|    |          |                                                                                                              |                                                   |
|----|----------|--------------------------------------------------------------------------------------------------------------|---------------------------------------------------|
| 37 | 05/12/13 | Juliet Dunlop: Men and women driven differently                                                              | Scotland On Sunday                                |
| 38 | 05/12/13 | It's all in the wiring                                                                                       | Sherbrooke Record (Quebec)                        |
| 39 | 05/12/13 | Study unveils differences in men, women's neural wiring                                                      | The Statesman (AsiaNet)                           |
| 40 | 05/12/13 | Women better than men at multitasking: Study                                                                 | The Statesman (AsiaNet)                           |
| 41 | 05/12/13 | It's official: Men, women are wired differently                                                              | The Times of India (TOI)                          |
| 42 | 04/12/13 | Paper Monitor: Battle of the sexes                                                                           | BBC News                                          |
| 43 | 04/12/13 | IIT Delhi alumnus discovers the difference between men and women brains                                      | Daily Bhaskar                                     |
| 44 | 04/12/13 | Women wired for success.; ...but men best at throwing                                                        | Daily Mirror                                      |
| 45 | 04/12/13 | IIT-Delhi alumni creates first map of neural circuitry                                                       | The Economic Times                                |
| 46 | 04/12/13 | In brief: It is pop psychology, not science, that divides the sexes                                          | The Guardian (London)                             |
| 47 | 04/12/13 | Multi-tasking: Women have better memory, attention                                                           | Hindustan Times                                   |
| 48 | 04/12/13 | The value of gender stereotypes; NOTEBOOK                                                                    | i                                                 |
| 49 | 04/12/13 | With motor skills legendary around several DVLA test centres, I'm a stereotypical woman. And no worse for it | The Independent (London)                          |
| 50 | 04/12/13 | OOPS! You mean men and women really are different?                                                           | Jewish World Review                               |
| 51 | 04/12/13 | SARAH VINE: Our batty brains will help women takeover the world                                              | Daily Mail (London)                               |
| 52 | 04/12/13 | Men's brains go back to front, women's go side to side                                                       | National Post (f/k/a The Financial Post) (Canada) |
| 53 | 04/12/13 | Why we're hemispheres apart                                                                                  | Northern Territory News (Australia)               |
| 54 | 04/12/13 | Women crap at parking: Official                                                                              | The Register                                      |
| 55 | 04/12/13 | Brain all about sex GREY AREA                                                                                | Sydney MX (Australia)                             |
| 56 | 04/12/13 | Why men can't explain women                                                                                  | The Times (South Africa)                          |
| 57 | 03/12/13 | Men and women's brains are wired differently: study                                                          | AFP - RELAXNEWS (English International Version)   |

|    |          |                                                                                                                                                                                                                            |                              |
|----|----------|----------------------------------------------------------------------------------------------------------------------------------------------------------------------------------------------------------------------------|------------------------------|
| 58 | 03/12/13 | The Difference Between Men and Women's Brains Revealed?                                                                                                                                                                    | The Blaze                    |
| 59 | 03/12/13 | Turns out men and women really do think differently, study finds; Findings suggest there are major differences in the wiring of male and female brains; researchers surprised how much the findings con-firmed stereotypes | The Globe and Mail           |
| 60 | 03/12/13 | Proof men and women are poles apart                                                                                                                                                                                        | The Daily Telegraph (London) |
| 61 | 03/12/13 | SORRY CHAPS, YOUR BRAINS AREN'T MADE FOR MULTI-TASKING                                                                                                                                                                     | DAILY MAIL (London)          |
| 62 | 03/12/13 | Is Equal Opportunity Threatened By New Findings That Female And Male Brains Are Different?                                                                                                                                 | Forbes Magazine              |
| 63 | 03/12/13 | How men's brains are wired differently than women's                                                                                                                                                                        | Fox News Network             |
| 64 | 03/12/13 | Women really are better at multitasking, study of brain wiring confirms                                                                                                                                                    | The Guardian (London)        |
| 65 | 03/12/13 | So, men and women's brains are wired differently - but it's not that simple                                                                                                                                                | The Guardian (London)        |
| 66 | 03/12/13 | How brains differ between genders                                                                                                                                                                                          | The Herald (Glasgow)         |
| 67 | 03/12/13 | Turns out men and women are different                                                                                                                                                                                      | Human Events Online          |
| 68 | 03/12/13 | Revealed at last: differences between the brains of men and women; SCIENCE                                                                                                                                                 | i                            |
| 69 | 03/12/13 | The difference between men and women is all in the head                                                                                                                                                                    | Irish Independent            |
| 70 | 03/12/13 | Yes, each sex really is from different planet                                                                                                                                                                              | Metro (UK)                   |
| 71 | 03/12/13 | Why men are better navigators, and women have better memory                                                                                                                                                                | MINT                         |
| 72 | 03/12/13 | Men and women wired like different species - expert                                                                                                                                                                        | The New Zealand Herald       |
| 73 | 03/12/13 | Brains 'different between genders', study says                                                                                                                                                                             | News Shopper                 |
| 74 | 03/12/13 | Men and women's brains are wired differently, study finds                                                                                                                                                                  | PBS NewsHour                 |
| 75 | 03/12/13 | Penn study: How women's brains differ from men's                                                                                                                                                                           | The Philadelphia Inquirer    |
| 76 | 03/12/13 | 'Men, women's brains wired differently'                                                                                                                                                                                    | Press TV - Iran              |
| 77 | 03/12/13 | Brain wired differently in men and women                                                                                                                                                                                   | Samay Live                   |
| 78 | 03/12/13 | Brains Of Men And Women 'Wired Differently'                                                                                                                                                                                | Sky News                     |

|    |          |                                                                                                                                                                                    |                              |
|----|----------|------------------------------------------------------------------------------------------------------------------------------------------------------------------------------------|------------------------------|
| 79 | 03/12/13 | LET'S TALK ABOUT CORTEX, BABY..;                                                                                                                                                   | The Sun (England)            |
| 80 | 03/12/13 | Brains of men and women are poles apart; Differences in the way the brains of men and women are wired helps to explain why men are better at navigating while women can multi-task | The Daily Telegraph (London) |
| 81 | 03/12/13 | Male and female brains are planets apart in their wiring                                                                                                                           | The Times (London)           |
| 82 | 03/12/13 | Why Men and Women's Brains Work Differently: It's All About the Wiring                                                                                                             | Time (USA)                   |
| 83 | 02/12/13 | The hardwired difference between male and female brains could explain why men are 'better at map reading';<br>And why women are 'better at remembering a conversation'             | The Independent (London)     |
| 84 | 02/12/13 | Brain Scans May Support Venus/Mars Divide Between Sexes                                                                                                                            | Web MD                       |
| 85 | 02/12/13 | BRAIN CONNECTIVITY STUDY REVEALS STRIKING DIFFERENCES BETWEEN MEN AND WOMEN                                                                                                        | States News Service          |
| 86 | 02/12/13 | Why men and women behave differently - Former IIT Delhi computer science student discovers gender differences in the human brain                                                   | The Telegraph (India)        |
| 87 | 02/12/13 | It's true, scientists say: Brains of men and women wired differently                                                                                                               | UPI                          |
