# Supplementary material for: Gender on the Brain: A Case Study of Science Communication in the New Media Environment
Source: PubMed Central journal article supplement (PMC4212998; doi:10.1371/journal.pone.0110830), 2014-10-29
Supplement: pone.0110830.s002.pdf [file pone.0110830.s002.pdf]

### Blog posts included in the analysis

| ID | DATE     | ARTICLE TITLE                                                                    | BLOG TITLE              | URL                                                                                                                                                                                                                                                 |
|----|----------|----------------------------------------------------------------------------------|-------------------------|-----------------------------------------------------------------------------------------------------------------------------------------------------------------------------------------------------------------------------------------------------|
| 1  | 03/12/13 | Health: Contrasting Brain Wiring In Men And Women May Explain Gender Differences | CBS Philly              | <a href="http://philadelphia.cbslocal.com/2013/12/03/study-different-brain-wiring-in-men-and-women-may-explain-differences/">http://philadelphia.cbslocal.com/2013/12/03/study-different-brain-wiring-in-men-and-women-may-explain-differences/</a> |
| 2  | 03/12/13 | Brain Connectivity Varies Between Men and Women                                  | Psychology Today        | <a href="http://www.psychologytoday.com/blog/the-athletes-way/201312/brain-connectivity-varies-between-men-and-women">http://www.psychologytoday.com/blog/the-athletes-way/201312/brain-connectivity-varies-between-men-and-women</a>               |
| 3  | 11/12/13 | Be Wary of Studies That Claim Men and Women's Brains Are Wired Differently       | New Republic            | <a href="http://www.newrepublic.com/article/115893/gender-brain-studies-claim-men-and-women-are-wired-differently">http://www.newrepublic.com/article/115893/gender-brain-studies-claim-men-and-women-are-wired-differently</a>                     |
| 4  | 05/12/13 | Brain scans shows male and female brains are wired differently                   | Wavuti                  | <a href="http://www.wavuti.com/4/post/2013/12/brain-scans-shows-male-and-female-brains-are-wired-differently.html">http://www.wavuti.com/4/post/2013/12/brain-scans-shows-male-and-female-brains-are-wired-differently.html</a>                     |
| 5  | 17/12/13 | New Brain Study Illustrates Gender Differences                                   | Cultural Detective Blog | <a href="http://blog.culturaldetective.com/2013/12/17/new-brain-study-illustrates-gender-differences/">http://blog.culturaldetective.com/2013/12/17/new-brain-study-illustrates-gender-differences/</a>                                             |
| 6  | 02/12/13 | Male and Female Brains Wired Differently                                         | Guardian Liberty Voice  | <a href="http://guardianlv.com/2013/12/male-and-female-brains-wired-differently/">http://guardianlv.com/2013/12/male-and-female-brains-wired-differently/</a>                                                                                       |
| 7  | 17/12/13 | Battle of the brain's sex differences...or not really?                           | The Brain Bank          | <a href="http://thebrainbank.scienceblog.com/2013/12/17/battle-of-the-brains-sex-differences-or-not-really/">http://thebrainbank.scienceblog.com/2013/12/17/battle-of-the-brains-sex-differences-or-not-really/</a>                                 |
| 8  | 03/12/13 | Men and women's brains are hard wired differently, study shows                   | ZME Science             | <a href="http://www.zmescience.com/medicine/mind-and-brain/man-women-brain-03122013/">http://www.zmescience.com/medicine/mind-and-brain/man-women-brain-03122013/</a>                                                                               |
| 9  | 30/12/13 | PENN STUDY: HOW WOMEN'S BRAINS DIFFER FROM MEN'S                                 | Brain and Spine Surgeon | <a href="http://www.brainandspinesurgeon.com/2013/12/30/penn-study-how-womens-brains-differ-from-mens-philly-com-2/">http://www.brainandspinesurgeon.com/2013/12/30/penn-study-how-womens-brains-differ-from-mens-philly-com-2/</a>                 |
| 10 | 08/12/13 | Differences in the brain wiring of men and women                                 | Free Thought Blogs      | <a href="http://freethoughtblogs.com/singham/2013/12/08/differences-in-the-brain-wiring-of-men-and-women/">http://freethoughtblogs.com/singham/2013/12/08/differences-in-the-brain-wiring-of-men-and-women/</a>                                     |
| 11 | 05/12/13 | men are map readers and women are intuitive, but bloggers are fast               | Neurocritic             | <a href="http://neurocritic.blogspot.co.uk/2013/12/men-are-map-readers-and-women-are.html">http://neurocritic.blogspot.co.uk/2013/12/men-are-map-readers-and-women-are.html</a>                                                                     |

|    |          |                                                                                         |                                              |                                                                                                                                                                                                                                                                           |
|----|----------|-----------------------------------------------------------------------------------------|----------------------------------------------|---------------------------------------------------------------------------------------------------------------------------------------------------------------------------------------------------------------------------------------------------------------------------|
| 12 | 03/12/13 | Brain wiring differently between men and women                                          | National Turk                                | <a href="http://www.nationalturk.com/en/brain-wiring-differently-between-men-and-women-video-strange-news-45168">http://www.nationalturk.com/en/brain-wiring-differently-between-men-and-women-video-strange-news-45168</a>                                               |
| 13 | 04/12/13 | Sex Differences in the Brain                                                            | Hooking Up Smart                             | <a href="http://www.hookingupsmart.com/2013/12/04/politics-and-feminism/sex-differences-brain/">http://www.hookingupsmart.com/2013/12/04/politics-and-feminism/sex-differences-brain/</a>                                                                                 |
| 14 | 12/12/13 | Gender Differences in the Brain Explain Behaviour, Truth or Delusion?                   | United Academics                             | <a href="http://www.united-academics.org/magazine/mind-brain/gender-differences-in-the-brain-explain-behaviour-truth-or-delusion/">http://www.united-academics.org/magazine/mind-brain/gender-differences-in-the-brain-explain-behaviour-truth-or-delusion/</a>           |
| 15 | 03/12/13 | Gender differences in brain connectivity (if any) aren't hard-wired                     | New APPS: Art, Politics, Philosophy, Science | <a href="http://www.newappsblog.com/2013/12/gender-differences-in-brain-connectivity-if-any-arent-hard-wired.html">http://www.newappsblog.com/2013/12/gender-differences-in-brain-connectivity-if-any-arent-hard-wired.html</a>                                           |
| 16 | 13/12/13 | TWO STUDIES ON BRAIN WIRING: THE DIFFERENCES BETWEEN THE SEXES AND PATERNAL DEPRIVATION | Business of Life                             | <a href="http://www.estatevaults.com/bol/archives/2013/12/13/two_studies_on.html">http://www.estatevaults.com/bol/archives/2013/12/13/two_studies_on.html</a>                                                                                                             |
| 17 | 05/12/13 | The sex of the brain                                                                    | The Atheist Conservative                     | <a href="http://theatheistconservative.com/2013/12/05/the-sex-of-the-brain/">http://theatheistconservative.com/2013/12/05/the-sex-of-the-brain/</a>                                                                                                                       |
| 18 | 12/12/13 | Chicken or Egg? New Research Shows Men and Women's Brains are Wired Differently         | Brain & Behavior Research Foundation         | <a href="http://bbrfoundation.org/brain-matters-discoveries/chicken-or-egg-new-research-shows-men-and-women%E2%80%99s-brains-are-wired">http://bbrfoundation.org/brain-matters-discoveries/chicken-or-egg-new-research-shows-men-and-women%E2%80%99s-brains-are-wired</a> |
| 19 | 10/12/13 | Brain Study Confirms Gender Stereotypes                                                 | Momma Said                                   | <a href="http://mommasaid.net/2013/12/10/brain-gender-stereotypes/">http://mommasaid.net/2013/12/10/brain-gender-stereotypes/</a>                                                                                                                                         |
| 20 | 03/12/13 | Brain imaging study shows 'stark difference' in neural wiring of men and women          | Raw Story                                    | <a href="http://www.rawstory.com/rs/2013/12/03/brain-imaging-shows-stark-difference-in-neural-wiring-of-men-and-women/">http://www.rawstory.com/rs/2013/12/03/brain-imaging-shows-stark-difference-in-neural-wiring-of-men-and-women/</a>                                 |
| 21 | 03/12/13 | Male and female brains wired differently, scans reveal                                  | Mail & Guardian Women                        | <a href="http://women.mg.co.za/male-and-female-brains-wired-differently-scans-reveal/">http://women.mg.co.za/male-and-female-brains-wired-differently-scans-reveal/</a>                                                                                                   |
| 22 | 02/12/13 | Scans May Support Venus/Mars Divide Between Sexes                                       | Web MD                                       | <a href="http://www.webmd.com/sex-relationships/news/20131202/brain-scans-may-support-venusmars-divide-between-sexes">http://www.webmd.com/sex-relationships/news/20131202/brain-scans-may-support-venusmars-divide-between-sexes</a>                                     |

|    |          |                                                                         |                                              |                                                                                                                                                                                                                                                       |
|----|----------|-------------------------------------------------------------------------|----------------------------------------------|-------------------------------------------------------------------------------------------------------------------------------------------------------------------------------------------------------------------------------------------------------|
| 23 | 19/12/13 | Biological Differences Between Men and Women                            | Natural Health Blog                          | <a href="http://jonbarron.org/happiness-mental-health/men-and-women-really-are-different#.UvNd7_I_vYg">http://jonbarron.org/happiness-mental-health/men-and-women-really-are-different#.UvNd7_I_vYg</a>                                               |
| 24 | 10/12/13 | Brain 'wired differently' in men and women                              | u-VIB Blog                                   | <a href="http://bloguvib.wordpress.com/2013/12/10/brain-wired-differently-in-men-and-women/">http://bloguvib.wordpress.com/2013/12/10/brain-wired-differently-in-men-and-women/</a>                                                                   |
| 25 | 03/12/13 | Sex on the Brain: Are Male and Female Brains Fundamentally Different?   | Extravolution                                | <a href="http://www.extravolution.com/2013/12/sex-on-brain-are-male-and-female-brains.html">http://www.extravolution.com/2013/12/sex-on-brain-are-male-and-female-brains.html</a>                                                                     |
| 26 | 19/12/13 | Speak to the Person, Not the Gender                                     | Persuasive Litigator                         | <a href="http://www.persuasivelitigator.com/2013/12/speak-to-the-person-not-the-gender.html">http://www.persuasivelitigator.com/2013/12/speak-to-the-person-not-the-gender.html</a>                                                                   |
| 27 | 04/12/13 | Brain wired differently in men and women                                | abnews 24                                    | <a href="http://abnews24.com/en/2013/12/04/brain-wired-differently-in-men-and-women/">http://abnews24.com/en/2013/12/04/brain-wired-differently-in-men-and-women/</a>                                                                                 |
| 28 | 05/12/13 | Gender-specific findings of new brain-connectivity study are questioned | Minn Post                                    | <a href="http://www.minnpost.com/second-opinion/2013/12/gender-specific-findings-new-brain-connectivity-study-are-questioned">http://www.minnpost.com/second-opinion/2013/12/gender-specific-findings-new-brain-connectivity-study-are-questioned</a> |
| 29 | 09/12/13 | Male and Female Brains Really Are Built Differently                     | Pandagon                                     | <a href="http://www.pandagon.net/2013/12/male-and-female-brains-really-are-built-differently/">http://www.pandagon.net/2013/12/male-and-female-brains-really-are-built-differently/</a>                                                               |
| 30 | 04/12/13 | Male and Female Brains                                                  | An Exercise in the Fundamentals of Orthodoxy | <a href="http://www.peter-ould.net/2013/12/04/male-and-female-brains/">http://www.peter-ould.net/2013/12/04/male-and-female-brains/</a>                                                                                                               |
| 31 | 03/12/13 | THE REAL REASON WHY MEN AND WOMEN ARE DIFFERENT!                        | Dr. Pinna                                    | <a href="http://drpinna.com/the-real-reason-why-men-and-women-are-different-37516">http://drpinna.com/the-real-reason-why-men-and-women-are-different-37516</a>                                                                                       |
| 32 | 04/12/13 | Male and female brains wired differently, scans reveal                  | The Truth Seeker                             | <a href="http://www.thetruthseeker.co.uk/?p=85666">http://www.thetruthseeker.co.uk/?p=85666</a>                                                                                                                                                       |
| 33 | 10/12/13 | Men and Women Brain 'Wired differently'                                 | Today Outlook                                | <a href="http://www.todayoutlook.com/men-and-women-brain-wired-differently/">http://www.todayoutlook.com/men-and-women-brain-wired-differently/</a>                                                                                                   |
| 34 | 24/12/13 | Sex Differences: the Male and Female Brain                              | Stein Center for Social Research             | <a href="http://stein-center.org/2013/12/24/sex-differences-the-male-and-female-brain/">http://stein-center.org/2013/12/24/sex-differences-the-male-and-female-brain/</a>                                                                             |
| 35 | 05/12/13 | Brains of men and women wired differently                               | Emax Health                                  | <a href="http://www.emaxhealth.com/11400/study-proves-men-and-womens-brains-are-wired-differently">http://www.emaxhealth.com/11400/study-proves-men-and-womens-brains-are-wired-differently</a>                                                       |

|    |          |                                                                                                                                    |                               |                                                                                                                                                                                                                                                                                                                                                               |
|----|----------|------------------------------------------------------------------------------------------------------------------------------------|-------------------------------|---------------------------------------------------------------------------------------------------------------------------------------------------------------------------------------------------------------------------------------------------------------------------------------------------------------------------------------------------------------|
| 36 | 03/01/14 | Good read: Sex-trapolation in the Latest Brain Science                                                                             | The Economy of meaning        | <a href="http://theeconomyofmeaning.com/2014/01/03/good-read-sex-trapolation-in-the-latest-brain-science/">http://theeconomyofmeaning.com/2014/01/03/good-read-sex-trapolation-in-the-latest-brain-science/</a>                                                                                                                                               |
| 37 | 02/12/13 | Brain Connectivity Study Reveals Striking Differences Between Men and Women                                                        | USA News                      | <a href="http://www.dailynewsen.com/science-news/brain-connectivity-study-reveals-striking-differences-between-men-and-women-h1351761.html">http://www.dailynewsen.com/science-news/brain-connectivity-study-reveals-striking-differences-between-men-and-women-h1351761.html</a>                                                                             |
| 38 | 15/12/13 | Brain wiring and science reporting                                                                                                 | Language Log                  | <a href="http://languagelog ldc.upenn.edu/nll/?p=9043">http://languagelog ldc.upenn.edu/nll/?p=9043</a>                                                                                                                                                                                                                                                       |
| 39 | 12/03/13 | New Study Provides Earth-Shattering Insight Into Fact That Women And Men's Brains Are Different And Actually Complement Each Other | Shepherds Piehole             | <a href="http://shepherdspiehole.typepad.com/shepherds-piehole/2013/12/new-study-provides-earth-shattering-insight-into-fact-that-women-and-mens-brains-are-different-and-a.html">http://shepherdspiehole.typepad.com/shepherds-piehole/2013/12/new-study-provides-earth-shattering-insight-into-fact-that-women-and-mens-brains-are-different-and-a.html</a> |
| 40 | 06/12/13 | Gender Stereotypes Explained by Hardwired Differences Between Male and Female Brains                                               | Discovery Fit & Health Blogs  | <a href="http://blogs.discovery.com/dfh-sara-novak/2013/12/gender-stereotypes-explained-by-hardwired-differences-between-male-and-female-brains.html">http://blogs.discovery.com/dfh-sara-novak/2013/12/gender-stereotypes-explained-by-hardwired-differences-between-male-and-female-brains.html</a>                                                         |
| 41 | 16/12/13 | Destiny and the Gendered Brain                                                                                                     | al fin next level             | <a href="http://alfinnextlevel.wordpress.com/2013/12/16/destiny-and-the-gendered-brain/">http://alfinnextlevel.wordpress.com/2013/12/16/destiny-and-the-gendered-brain/</a>                                                                                                                                                                                   |
| 42 | 05/12/13 | Science figuring out that men and women are different                                                                              | Church of God News            | <a href="http://www.cogwriter.com/news/doctrine/science-figuring-out-that-men-and-women-are-different/">http://www.cogwriter.com/news/doctrine/science-figuring-out-that-men-and-women-are-different/</a>                                                                                                                                                     |
| 43 | 03/12/13 | Men and women's brains are wired differently                                                                                       | Capital FM Lifestyle Magazine | <a href="http://www.capitalfm.co.ke/lifestyle/2013/12/03/men-and-womens-brains-are-wired-differently/">http://www.capitalfm.co.ke/lifestyle/2013/12/03/men-and-womens-brains-are-wired-differently/</a>                                                                                                                                                       |
| 44 | 10/12/13 | Gender Differences Hard Wired                                                                                                      | The Cagle Post                | <a href="http://www.cagle.com/2013/12/gender-differences-hard-wired/">http://www.cagle.com/2013/12/gender-differences-hard-wired/</a>                                                                                                                                                                                                                         |
| 45 | 04/12/13 | Getting in a Tangle Over Men's and Women's Brain Wiring                                                                            | Wired                         | <a href="http://www.wired.com/wiredscience/2013/12/getting-in-a-tangle-over-men-and-womens-brain-wiring/">http://www.wired.com/wiredscience/2013/12/getting-in-a-tangle-over-men-and-womens-brain-wiring/</a>                                                                                                                                                 |
| 46 | 04/12/13 | Accepting Sex Differences Amount to "Anti-American Crazy Thinking"                                                                 | Women for Women               | <a href="http://womenformen.org/2013/12/04/accepting-sex-differences-amount-to-anti-american-crazy-thinking/">http://womenformen.org/2013/12/04/accepting-sex-differences-amount-to-anti-american-crazy-thinking/</a>                                                                                                                                         |

|    |          |                                                                                             |                               |                                                                                                                                                                                                                                                                               |
|----|----------|---------------------------------------------------------------------------------------------|-------------------------------|-------------------------------------------------------------------------------------------------------------------------------------------------------------------------------------------------------------------------------------------------------------------------------|
| 47 | 05/12/13 | Bad neuroscience and gender: reading this will change your brain                            | NO MEASURE OF HEALTH          | <a href="http://eldan.co.uk/2013/12/bad-neuroscience-and-gender-reading-this-will-change-your-brain/">http://eldan.co.uk/2013/12/bad-neuroscience-and-gender-reading-this-will-change-your-brain/</a>                                                                         |
| 48 | 03/12/13 | Scientists Discover Difference Between Brains of Males and Females                          | Black Christian news          | <a href="http://www.blackchristiannews.com/news/2013/12/scientists-discover-difference-between-brains-of-males-and-females.html">http://www.blackchristiannews.com/news/2013/12/scientists-discover-difference-between-brains-of-males-and-females.html</a>                   |
| 49 | 03/12/13 | Scientists Prove Men & Women Do Think Differently After All                                 | Indie Genius Productions Blog | <a href="http://indiegeniusproductions.wordpress.com/2013/12/03/scientists-prove-men-women-do-think-differently-after-all/">http://indiegeniusproductions.wordpress.com/2013/12/03/scientists-prove-men-women-do-think-differently-after-all/</a>                             |
| 50 | 02/12/13 | Brain Connectivity Study Reveals Striking Differences Between Men and Women                 | Scientific Outlook            | <a href="http://scientificoutlook.com.np/brain-connectivity-study-reveals-striking-differences-between-men-and-women/">http://scientificoutlook.com.np/brain-connectivity-study-reveals-striking-differences-between-men-and-women/</a>                                       |
| 51 | 03/12/13 | The Male Brain vs. the Female Brain                                                         | Had Enough Therapy?           | <a href="http://stuartschneiderman.blogspot.co.uk/2013/12/the-male-brain-vs-female-brain.html">http://stuartschneiderman.blogspot.co.uk/2013/12/the-male-brain-vs-female-brain.html</a>                                                                                       |
| 52 | 05/12/13 | Male/Female brain "wiring" differences                                                      | Talk Rational                 | <a href="http://talkrational.org/showthread.php?t=60967">http://talkrational.org/showthread.php?t=60967</a>                                                                                                                                                                   |
| 53 | 08/12/13 | Study Confirms Existence of Women's Intuition                                               | Ricochet                      | <a href="http://ricochet.com/main-feed/Study-Confirms-Existence-of-Women-s-Intuition">http://ricochet.com/main-feed/Study-Confirms-Existence-of-Women-s-Intuition</a>                                                                                                         |
| 54 | 03/12/13 | MEN CAN'T MULTITASK, WOMEN HAVE BETTER MEMORY, STUDY LED BY INDIAN-ORIGIN SCIENTIST REVEALS | Researchers Club              | <a href="http://researchersclub.org/2013/12/03/men-cant-multitask-women-have-better-memory-study-led-by-indian-origin-scientist-reveals/">http://researchersclub.org/2013/12/03/men-cant-multitask-women-have-better-memory-study-led-by-indian-origin-scientist-reveals/</a> |
| 55 | 09/12/13 | The Brains Of Men And Women Are Different                                                   | Abb Takk                      | <a href="http://abbtakk.tv/eng/the-brains-of-men-and-women-are-different-91213/">http://abbtakk.tv/eng/the-brains-of-men-and-women-are-different-91213/</a>                                                                                                                   |
| 56 | 03/12/13 | And Now for Your Gender-Biased Brain Science Update                                         | truthdig                      | <a href="http://www.truthdig.com/eartothe-ground/item/and_now_for_your_gender-biased_brain_science_update_20131203">http://www.truthdig.com/eartothe-ground/item/and_now_for_your_gender-biased_brain_science_update_20131203</a>                                             |
| 57 | 02/12/13 | Women's Brains Wired Left To Right                                                          | People's Blog                 | <a href="http://thepeoplescube.com/peoples-blog/women-s-brains-wired-left-to-right-t12421.html">http://thepeoplescube.com/peoples-blog/women-s-brains-wired-left-to-right-t12421.html</a>                                                                                     |
| 58 | 03/12/13 | No, Our Brains Aren't Hardwired According to Gender Stereotypes                             | Motherboard                   | <a href="http://motherboard.vice.com/blog/no-our-brains-arent-hardwired-according-to-gender-stereotypes">http://motherboard.vice.com/blog/no-our-brains-arent-hardwired-according-to-gender-stereotypes</a>                                                                   |

|    |          |                                                                                                                          |                           |                                                                                                                                                                                                                                                                                                                         |
|----|----------|--------------------------------------------------------------------------------------------------------------------------|---------------------------|-------------------------------------------------------------------------------------------------------------------------------------------------------------------------------------------------------------------------------------------------------------------------------------------------------------------------|
| 59 | 11/12/13 | Breaking News: Men and Women Think Differently                                                                           | OAK RIDGE NOW             | <a href="http://www.oakridgenow.com/2013/12/11/breaking-news-men-and-women-think-differently/">http://www.oakridgenow.com/2013/12/11/breaking-news-men-and-women-think-differently/</a>                                                                                                                                 |
| 60 | 07/12/13 | Gender differences hard-wired                                                                                            | Trib LIVE                 | <a href="http://triblive.com/opinion/tompurcell/5202455-74/women-brain-wired#axzz2sXbaE9gH">http://triblive.com/opinion/tompurcell/5202455-74/women-brain-wired#axzz2sXbaE9gH</a>                                                                                                                                       |
| 61 | 15/12/13 | Gender Differences Hard Wired                                                                                            | Right Wing News           | <a href="http://www.rightwingnews.com/column-2/gender-differences-hard-wired/">http://www.rightwingnews.com/column-2/gender-differences-hard-wired/</a>                                                                                                                                                                 |
| 62 | 02/01/14 | SHOCK STUDY REVEALS... MEN AND WOMEN ARE DIFFERENT                                                                       | The College Fix           | <a href="http://www.thecollegefix.com/post/15765/">http://www.thecollegefix.com/post/15765/</a>                                                                                                                                                                                                                         |
| 63 | 03/12/14 | The hardwired difference between male and female brains                                                                  | Above Top Secret          | <a href="http://www.abovetopsecret.com/forum/thread985944/pg1">http://www.abovetopsecret.com/forum/thread985944/pg1</a>                                                                                                                                                                                                 |
| 64 | 04/12/14 | Incredible Brain-Scans Reveal Men And Women's Brains ARE Wired Differently                                               | 2 Oceans Vibe News        | <a href="http://www.2oceansvibe.com/2013/12/04/incredible-brain-scans-reveal-men-and-womens-brains-are-wired-differently/">http://www.2oceansvibe.com/2013/12/04/incredible-brain-scans-reveal-men-and-womens-brains-are-wired-differently/</a>                                                                         |
| 65 | 09/12/13 | Literally Messing with their Brain. What Recent Scientific Studies Can Teach Us About Ourselves and Raising our Children | Archdiocese of Washington | <a href="http://blog.adw.org/2013/12/literally-messing-with-their-brain-what-recent-scientific-studies-can-teach-us-about-ourselves-and-raising-our-children/">http://blog.adw.org/2013/12/literally-messing-with-their-brain-what-recent-scientific-studies-can-teach-us-about-ourselves-and-raising-our-children/</a> |
| 66 | 03/12/13 | Confirmed: Male And Female Brains Are Wired Differently.                                                                 | Tailored Chap             | <a href="http://tailoredchap.com/blog/confirmed-male-and-female-brains-are-wired-differently/">http://tailoredchap.com/blog/confirmed-male-and-female-brains-are-wired-differently/</a>                                                                                                                                 |
| 67 | 04/12/13 | Male, Female Brains Are Wired Very Differently, Scans Show                                                               | James' World              | <a href="http://jamesworld119.wordpress.com/2013/12/04/male-female-brains-are-wired-very-differently-scans-show/">http://jamesworld119.wordpress.com/2013/12/04/male-female-brains-are-wired-very-differently-scans-show/</a>                                                                                           |
| 68 | 04/12/13 | PNAS: male, female brains wired along different paths                                                                    | the reference frame       | <a href="http://motls.blogspot.co.uk/2013/12/pnas-male-female-brains-wired-along.html">http://motls.blogspot.co.uk/2013/12/pnas-male-female-brains-wired-along.html</a>                                                                                                                                                 |
| 69 | 12/12/13 | A Silly Sex Post                                                                                                         | A View from the Beach     | <a href="http://fritz-aviewfromthebeach.blogspot.co.uk/2013/12/a-silly-sex-post.html">http://fritz-aviewfromthebeach.blogspot.co.uk/2013/12/a-silly-sex-post.html</a>                                                                                                                                                   |
| 70 | 04/12/13 | Different Brain Wiring Is What Makes Men and Women Different                                                             | ABC News Radio Online     | <a href="http://abcnewsradioonline.com/health-news/different-brain-wiring-is-what-makes-men-and-women-different.html">http://abcnewsradioonline.com/health-news/different-brain-wiring-is-what-makes-men-and-women-different.html</a>                                                                                   |

|    |          |                                                                                                                                                                                                                                    |                          |                                                                                                                                                                                                                                                                                                                                                                                                                                                                         |
|----|----------|------------------------------------------------------------------------------------------------------------------------------------------------------------------------------------------------------------------------------------|--------------------------|-------------------------------------------------------------------------------------------------------------------------------------------------------------------------------------------------------------------------------------------------------------------------------------------------------------------------------------------------------------------------------------------------------------------------------------------------------------------------|
| 71 | 05/12/13 | Men and women wired differently                                                                                                                                                                                                    | longevity LIVE           | <a href="http://www.longevitylive.com/a_health/men-and-women-wired-differently/">http://www.longevitylive.com/a_health/men-and-women-wired-differently/</a>                                                                                                                                                                                                                                                                                                             |
| 72 | 03/12/13 | Women are hardwired to think without thinking                                                                                                                                                                                      | Godlike Productions      | <a href="http://www.godlikeproductions.com/forum1/message2426619/pg1">http://www.godlikeproductions.com/forum1/message2426619/pg1</a>                                                                                                                                                                                                                                                                                                                                   |
| 73 | 04/12/13 | Scientists discover difference between male and female brains                                                                                                                                                                      | Lahore Times             | <a href="http://www.lhrtimes.com/2013/12/04/scientists-discover-difference-between-male-and-female-brains-213880/">http://www.lhrtimes.com/2013/12/04/scientists-discover-difference-between-male-and-female-brains-213880/</a>                                                                                                                                                                                                                                         |
| 74 | 03/12/13 | Sorry lads, girls really are better at multi-tasking: Proof brains really are different                                                                                                                                            | Daily Star               | <a href="http://www.dailystar.co.uk/news/latest-news/353900/Sorry-lads-girls-really-are-better-at-multi-tasking-Proof-brains-really-are-different">http://www.dailystar.co.uk/news/latest-news/353900/Sorry-lads-girls-really-are-better-at-multi-tasking-Proof-brains-really-are-different</a>                                                                                                                                                                         |
| 75 | 05/12/13 | New Study: The hardwired 'stark' difference between male and female brains explains why women are more intuitive — "It's quite striking how COMPLEMENTARY the brains of women and men really are."   God knew what He was doing :) | ONE can happen           | <a href="http://onecanhappen.wordpress.com/2013/12/05/study-the-hardwired-stark-difference-between-male-and-female-brains-explains-why-women-are-more-intuitive-its-quite-striking-how-complementary-the-brains-of-women-and-men-rea/">http://onecanhappen.wordpress.com/2013/12/05/study-the-hardwired-stark-difference-between-male-and-female-brains-explains-why-women-are-more-intuitive-its-quite-striking-how-complementary-the-brains-of-women-and-men-rea/</a> |
| 76 | 04/12/13 | Men vs. Women, Nature vs. Nurture                                                                                                                                                                                                  | Jesus Creed              | <a href="http://www.patheos.com/blogs/jesuscreed/2013/12/04/men-vs-women-nature-vs-nurture/">http://www.patheos.com/blogs/jesuscreed/2013/12/04/men-vs-women-nature-vs-nurture/</a>                                                                                                                                                                                                                                                                                     |
| 77 | 03/12/13 | Study: Men Only Using Half a Brain                                                                                                                                                                                                 | Pat's Papers             | <a href="http://www.patspapers.com/story_stack/item/study_men_only_using_half_a_brain/">http://www.patspapers.com/story_stack/item/study_men_only_using_half_a_brain/</a>                                                                                                                                                                                                                                                                                               |
| 78 | 03/12/13 | A quick moan about 'male' and 'female' brains                                                                                                                                                                                      | The Tangled Woof of Fact | <a href="http://tangledwoof.wordpress.com/2013/12/03/a-quick-moan-about-male-and-female-brains/">http://tangledwoof.wordpress.com/2013/12/03/a-quick-moan-about-male-and-female-brains/</a>                                                                                                                                                                                                                                                                             |
| 79 | 08/12/13 | MALE & FEMALE BRAINS ARE WIRED DIFFERENTLY                                                                                                                                                                                         | Super Human              | <a href="http://superhuman.ly/2013/12/08/male-female-brains-are-wired-differently/">http://superhuman.ly/2013/12/08/male-female-brains-are-wired-differently/</a>                                                                                                                                                                                                                                                                                                       |
| 80 | 03/12/13 | Men and women's brains are 'wired differently'                                                                                                                                                                                     | In2EastAfrica            | <a href="http://in2east africa.net/men-and-womens-brains-are-wired-differently/">http://in2east africa.net/men-and-womens-brains-are-wired-differently/</a>                                                                                                                                                                                                                                                                                                             |
| 81 | 03/12/13 | WASHINGTON: Men can't multitask and women have better                                                                                                                                                                              | Pakistan Defence         | <a href="http://defence.pk/threads/men-cant-multitask-women-have-better-memory.289759/">http://defence.pk/threads/men-cant-multitask-women-have-better-memory.289759/</a>                                                                                                                                                                                                                                                                                               |

|    |          |                                                                                                             |                             |                                                                                                                                                                                                                                                                                           |
|----|----------|-------------------------------------------------------------------------------------------------------------|-----------------------------|-------------------------------------------------------------------------------------------------------------------------------------------------------------------------------------------------------------------------------------------------------------------------------------------|
|    |          | memory because their brains are wired differently, a new study led by an Indian-origin scientist has found. |                             |                                                                                                                                                                                                                                                                                           |
| 82 | 03/12/13 | Men's and women's brains are different                                                                      | Neo-Neocon                  | <a href="http://neoneocon.com/2013/12/03/mens-and-womens-brains-are-different/">http://neoneocon.com/2013/12/03/mens-and-womens-brains-are-different/</a>                                                                                                                                 |
| 83 | 03/12/13 | New DUH Moment From The World Of Academic Medical Research                                                  | The Conservative Citizen    | <a href="http://constitutionclub.org/2013/12/03/new-duh-moment-from-the-world-of-academic-medical-research/">http://constitutionclub.org/2013/12/03/new-duh-moment-from-the-world-of-academic-medical-research/</a>                                                                       |
| 84 | 09/12/13 | Brains of men and women are wired differently                                                               | Professional Energy Healers | <a href="http://www.professionalenergyhealers.com/brains-of-men-and-women-are-wired-differently/">http://www.professionalenergyhealers.com/brains-of-men-and-women-are-wired-differently/</a>                                                                                             |
| 85 | 07/12/13 | Sex and brains: Vive la différence!                                                                         | Gonzalo Raffo InfoNews      | <a href="http://gonzalaraffofofonews.blogspot.co.uk/2013/12/sex-and-brains-vive-la-difference.html">http://gonzalaraffofofonews.blogspot.co.uk/2013/12/sex-and-brains-vive-la-difference.html</a>                                                                                         |
| 86 | 30/12/13 | Great Graphic: Neural Networks in Men and Women                                                             | Marc to Market              | <a href="http://www.marctomarket.com/2013/12/great-graphic-neural-networks-in-men.html">http://www.marctomarket.com/2013/12/great-graphic-neural-networks-in-men.html</a>                                                                                                                 |
| 87 | 11/12/13 | Science reporters fail to dig deep enough on male v. female brain story                                     | Genetic Literacy Project    | <a href="http://www.geneticliteracyproject.org/2013/12/11/science-reporters-fail-to-dig-deep-enough-on-male-v-female-brain-story/#.UvN_Wfl_vYg">http://www.geneticliteracyproject.org/2013/12/11/science-reporters-fail-to-dig-deep-enough-on-male-v-female-brain-story/#.UvN_Wfl_vYg</a> |
| 88 | 03/12/13 | Biden: 'I've Never Found' Women in Workforce to Be 'Kinder and Gentler'                                     | Lem's Levity                | <a href="http://comonocreerendios-lem.blogspot.co.uk/2013/12/biden-ive-never-found-women-in.html">http://comonocreerendios-lem.blogspot.co.uk/2013/12/biden-ive-never-found-women-in.html</a>                                                                                             |
| 89 | 03/12/13 | Brains Of Men And Women 'Wired Differently'                                                                 | Kwachanji                   | <a href="http://www.kwachanji.com/brains-of-men-and-women-wired-differently/">http://www.kwachanji.com/brains-of-men-and-women-wired-differently/</a>                                                                                                                                     |
| 90 | 13/12/13 | Venus + Mars Strike Again: Does Gender Affect Great Customer Service Agents?                                | Business 2 Community        | <a href="http://www.business2community.com/customer-experience/venus-mars-strike-gender-affect-great-customer-service-agents-0706411">http://www.business2community.com/customer-experience/venus-mars-strike-gender-affect-great-customer-service-agents-0706411</a>                     |
| 91 | 28/12/13 | This Week in the War on Women: December 28                                                                  | Daily Kos                   | <a href="http://www.dailykos.com/story/2013/12/28/1265738/-This-Week-in-the-War-on-Women-December-28#">http://www.dailykos.com/story/2013/12/28/1265738/-This-Week-in-the-War-on-Women-December-28#</a>                                                                                   |
| 92 | 03/12/13 | Male And Female Brains Are Planets Apart In Their Wiring                                                    | Working with God            | <a href="http://workingwithgod.com/?p=289">http://workingwithgod.com/?p=289</a>                                                                                                                                                                                                           |



|     |          |                                                                                               |                             |                                                                                                                                                                                                                                                                               |
|-----|----------|-----------------------------------------------------------------------------------------------|-----------------------------|-------------------------------------------------------------------------------------------------------------------------------------------------------------------------------------------------------------------------------------------------------------------------------|
| 93  | 12/13    | Why Women Have Sharper Memory than Men                                                        | Raha Tupu Wahubwa Info Site | <a href="http://www.rahatupu.info/2013/12/why-women-have-sharper-memory-than-men.html">http://www.rahatupu.info/2013/12/why-women-have-sharper-memory-than-men.html</a>                                                                                                       |
| 94  | 04/12/13 | in brief: women predisposed to multitasking, finds study                                      | lip THINK ABOUT IT          | <a href="http://lipmag.com/news/in-brief-women-hard-wired-for-multitasking-finds-study/">http://lipmag.com/news/in-brief-women-hard-wired-for-multitasking-finds-study/</a>                                                                                                   |
| 95  | 04/12/13 | Brains of Women and Men Show Strong Hard-wired Differences                                    | Dementia Today              | <a href="http://www.dementiatoday.com/brains-women-men-show-strong-hard-wired-differences/">http://www.dementiatoday.com/brains-women-men-show-strong-hard-wired-differences/</a>                                                                                             |
| 96  | 03/12/13 | Male and female brain connections are completely different                                    | BELLE NEWS                  | <a href="http://www.bellenews.com/2013/12/03/health/male-and-female-brain-connections-are-completely-different/">http://www.bellenews.com/2013/12/03/health/male-and-female-brain-connections-are-completely-different/</a>                                                   |
| 97  | 03/12/13 | Study Proves Male and Female Brains Are Wired Differently                                     | FOX NEWS [INSIDER]          | <a href="http://foxnewsinsider.com/2013/12/04/study-proves-male-and-female-brains-are-wired-differently">http://foxnewsinsider.com/2013/12/04/study-proves-male-and-female-brains-are-wired-differently</a>                                                                   |
| 98  | 03/12/13 | Male and Female "Wired" Differently According to Study                                        | Science Learning Centres    | <a href="http://www.sciencelearningcentres.org/science/male-and-female-wired-differently-according-to-study/">http://www.sciencelearningcentres.org/science/male-and-female-wired-differently-according-to-study/</a>                                                         |
| 99  | 03/12/13 | Men and Women Are Wired Differently, Listen to Katy Perry and John Mayer's New Song and More! | SELF                        | <a href="http://www.self.com/blogs/flash/2013/12/lunch-break-how-male-and-female-brains-are-wired-differently-john-mayer-katy-perry.html">http://www.self.com/blogs/flash/2013/12/lunch-break-how-male-and-female-brains-are-wired-differently-john-mayer-katy-perry.html</a> |
| 100 | 03/12/13 | Male and Female Brains Wired Differently, Scans Reveal                                        | Conscious Life News         | <a href="http://consciouslifeneeds.com/male-female-brains-wired-differently-scans-reveal/#">http://consciouslifeneeds.com/male-female-brains-wired-differently-scans-reveal/#</a>                                                                                             |
| 101 | 26/12/13 | Differences In Male/Female Brains: 3 Reasons For Fledgling Relationships                      | His Leadership Her Trust    | <a href="http://hisleadershiphertrust.com/differences-in-malefemale-brains-3-reasons-for-fledgling-relationships/">http://hisleadershiphertrust.com/differences-in-malefemale-brains-3-reasons-for-fledgling-relationships/</a>                                               |
| 102 | 03/12/13 | Men and women's brains are 'wired differently'                                                | Life Daily                  | <a href="http://lifedaily.net/men-and-womens-brains-are-wired-differently/">http://lifedaily.net/men-and-womens-brains-are-wired-differently/</a>                                                                                                                             |
| 103 | 06/12/13 | WOMEN BETTER LISTENERS THAN MEN                                                               | DAWNPAGES                   | <a href="http://dawnpages.wordpress.com/2013/12/06/women-better-listeners-than-men/">http://dawnpages.wordpress.com/2013/12/06/women-better-listeners-than-men/</a>                                                                                                           |
| 104 | 03/12/13 | Brain scans and 'good' mothers...                                                             | Cedar Lounge                | <a href="http://cedarlounge.wordpress.com/2013/12/03/brain-scans-and-good-mothers/">http://cedarlounge.wordpress.com/2013/12/03/brain-scans-and-good-mothers/</a>                                                                                                             |

|     |          |                                                                                                                                 |                        |                                                                                                                                                                                                                                   |
|-----|----------|---------------------------------------------------------------------------------------------------------------------------------|------------------------|-----------------------------------------------------------------------------------------------------------------------------------------------------------------------------------------------------------------------------------|
| 105 | 03/12/13 | Study: Men's And Women's Brains Wired Differently                                                                               | CBS New York           | <a href="http://newyork.cbslocal.com/2013/12/03/study-mens-and-womens-brains-wired-differently/">http://newyork.cbslocal.com/2013/12/03/study-mens-and-womens-brains-wired-differently/</a>                                       |
| 106 | 03/12/13 | The hardwired difference between male and female brains                                                                         | I Hate Men             | <a href="http://www.ihatemen.org/2013/12/03/the-hardwired-difference-between-male-and-female-brains/">http://www.ihatemen.org/2013/12/03/the-hardwired-difference-between-male-and-female-brains/</a>                             |
| 107 | 21/12/13 | Beyond Lazy Language: Hopes For Future Science Discourse                                                                        | Bluestockings Magazine | <a href="http://bluestockingsmag.com/2013/12/21/beyond-lazy-language-hopes-for-future-science-discourse/">http://bluestockingsmag.com/2013/12/21/beyond-lazy-language-hopes-for-future-science-discourse/</a>                     |
| 108 | 12/13    | The brains of men and women are connected differently                                                                           | World of Health        | <a href="http://world-of-health.com/the-brains-of-men-and-women-are-connected-differently/">http://world-of-health.com/the-brains-of-men-and-women-are-connected-differently/</a>                                                 |
| 109 | 04/12/13 | What's For Breakfast? Fried Girl and Boy Brainz! How Men's And Women's Brains are Dramatically Different And What It All Means. | Echidne of the Snakes  | <a href="http://echidneofthesnakes.blogspot.co.uk/2013/12/whats-for-breakfast-fried-girl-and-boy.html">http://echidneofthesnakes.blogspot.co.uk/2013/12/whats-for-breakfast-fried-girl-and-boy.html</a>                           |
| 110 | 12/12/13 | Men and Women's Brains Are 'Wired Differently'                                                                                  | The Aquila Report      | <a href="http://theaquilareport.com/men-and-womens-brains-are-wired-differently/">http://theaquilareport.com/men-and-womens-brains-are-wired-differently/</a>                                                                     |
| 111 | 09/12/13 | Asperger definition is like male brain                                                                                          | The Angry Dad          | <a href="http://blog.angry-dad.com/2013/12/asperger-definition-is-like-male-brain.html">http://blog.angry-dad.com/2013/12/asperger-definition-is-like-male-brain.html</a>                                                         |
| 112 | 03/12/13 | Men and women's brains are 'wired differently'                                                                                  | MGTOW FORUMS           | <a href="http://www.mgtowforums.com/forums/mgtow-general-discussion/20814-men-womens-brains-wired-differently.html">http://www.mgtowforums.com/forums/mgtow-general-discussion/20814-men-womens-brains-wired-differently.html</a> |
| 113 | 03/12/13 | Study reveals men and women's brains are wired differently                                                                      | The Malaysian Times    | <a href="http://www.themalaysiantimes.com.my/study-reveals-men-and-womens-brains-are-wired-differently/">http://www.themalaysiantimes.com.my/study-reveals-men-and-womens-brains-are-wired-differently/</a>                       |
| 114 | 03/12/13 | The Hardwired Difference Between Male and Female Brains                                                                         | iTulip                 | <a href="http://www.itulip.com/forums/showthread.php/26380-The-Hardwired-Difference-Between-Male-and-Female-Brains">http://www.itulip.com/forums/showthread.php/26380-The-Hardwired-Difference-Between-Male-and-Female-Brains</a> |
| 115 | 19/12/13 | Does size matter? Pink brains blue brains.                                                                                      | Bite Sized Brains      | <a href="http://bitesizedbrains.com/2013/12/19/does-size-matter-pink-brains-blue-brains/">http://bitesizedbrains.com/2013/12/19/does-size-matter-pink-brains-blue-brains/</a>                                                     |
| 116 | 04/12/13 | Connectivity: The Difference Between Men's and Women's Brains — PsyBlog                                                         | Yatin J. Patel         | <a href="http://yatinjpatel.com/2013/12/04/connectivity-the-difference-between-mens-and-womens-brains-psyblog/">http://yatinjpatel.com/2013/12/04/connectivity-the-difference-between-mens-and-womens-brains-psyblog/</a>         |

|     |          |                                                                                                                                                                  |                     |                                                                                                                                                                                                                                                                                                                                                                                                                           |
|-----|----------|------------------------------------------------------------------------------------------------------------------------------------------------------------------|---------------------|---------------------------------------------------------------------------------------------------------------------------------------------------------------------------------------------------------------------------------------------------------------------------------------------------------------------------------------------------------------------------------------------------------------------------|
| 117 | 15/12/13 | Differences in How Men and Women Think Are Hard-Wired; Recent Studies Raise the Possibility That Male Brains Are Wired for Focus, Female Brains for Multitasking | Bamboo Innovator    | <a href="http://bambooinnovator.com/2013/12/15/differences-in-how-men-and-women-think-are-hard-wired-recent-studies-raise-the-possibility-that-male-brains-are-wired-for-focus-female-brains-for-multitasking/">http://bambooinnovator.com/2013/12/15/differences-in-how-men-and-women-think-are-hard-wired-recent-studies-raise-the-possibility-that-male-brains-are-wired-for-focus-female-brains-for-multitasking/</a> |
| 118 | 06/12/13 | The sex of a brain                                                                                                                                               | The Connectivist    | <a href="http://www.theconnectivist.com/2013/12/throughthewire-126/">http://www.theconnectivist.com/2013/12/throughthewire-126/</a>                                                                                                                                                                                                                                                                                       |
| 119 | 03/12/13 | New brain study suggests men and women are wired differently.                                                                                                    | I Hate the Media    | <a href="http://www.ihatethemedia.com/new-brain-study-suggests-men-and-women-are-wired-differently">http://www.ihatethemedia.com/new-brain-study-suggests-men-and-women-are-wired-differently</a>                                                                                                                                                                                                                         |
| 120 | 03/12/13 | Another Study Proves Nature is Sexist                                                                                                                            | Margery + The Man   | <a href="http://margeryandtheman.wordpress.com/2013/12/03/another-study-proves-nature-is-sexist/">http://margeryandtheman.wordpress.com/2013/12/03/another-study-proves-nature-is-sexist/</a>                                                                                                                                                                                                                             |
| 121 | 03/12/13 | Men, Women, and Big PNAS Papers                                                                                                                                  | Neuroskeptic        | <a href="http://blogs.discovermagazine.com/neuroskeptic/2013/12/03/men-women-big-pnas-papers/#.UvOhBfl_vYg">http://blogs.discovermagazine.com/neuroskeptic/2013/12/03/men-women-big-pnas-papers/#.UvOhBfl_vYg</a>                                                                                                                                                                                                         |
| 122 | 12/13    | We Really Are Wired Differently!                                                                                                                                 | Malcolm OUT LOUD    | <a href="http://www.malcolmoutloud.tv/tools/?p=4552">http://www.malcolmoutloud.tv/tools/?p=4552</a>                                                                                                                                                                                                                                                                                                                       |
| 123 | 11/12/13 | Science supports complementarianism! Warning: political incorrectness within—enter at your own risk!                                                             | Bereans @ The Gate  | <a href="http://bereansatthegate.com/2013/12/11/science-supports-complementarianism-warning-political-incorrectness-within-enter-at-your-own-risk/">http://bereansatthegate.com/2013/12/11/science-supports-complementarianism-warning-political-incorrectness-within-enter-at-your-own-risk/</a>                                                                                                                         |
| 124 | 03/12/13 | Men and women's brains are different- it's official                                                                                                              | Health Direct       | <a href="http://www.healthdirect.co.uk/2013/12/men-and-womens-brains-are-different-its-official.html">http://www.healthdirect.co.uk/2013/12/men-and-womens-brains-are-different-its-official.html</a>                                                                                                                                                                                                                     |
| 125 | 13/12/13 | Calling All Female Brains: Stop the 'Neurosexism'                                                                                                                | Women's eNews       | <a href="http://womensenews.org/story/women-in-science/131212/calling-all-female-brains-stop-the-neurosexism#.UvOq9fl_vYg">http://womensenews.org/story/women-in-science/131212/calling-all-female-brains-stop-the-neurosexism#.UvOq9fl_vYg</a>                                                                                                                                                                           |
| 126 | 03/12/13 | Men and women's brains are wired differently                                                                                                                     | mySarawak           | <a href="http://www.mysarawak.org/2013/12/men-and-womens-brains-are-wired-differently.html">http://www.mysarawak.org/2013/12/men-and-womens-brains-are-wired-differently.html</a>                                                                                                                                                                                                                                         |
| 127 | 03/12/13 | Men and women's brains are 'wired differently'                                                                                                                   | Naija247 News       | <a href="http://naija247news.com/men-womens-brains-wired-differently/#.UvOq_vl_vYg">http://naija247news.com/men-womens-brains-wired-differently/#.UvOq_vl_vYg</a>                                                                                                                                                                                                                                                         |
| 128 | 11/12/13 | Cordelia Fine - New Insights into Gendered Brain Wiring, or a Perfect                                                                                            | The Masculine Heart | <a href="http://masculineheart.blogspot.co.uk/2013/12/cordelia-fine-new-insights-into.html">http://masculineheart.blogspot.co.uk/2013/12/cordelia-fine-new-insights-into.html</a>                                                                                                                                                                                                                                         |

|     |          |                                                                                                      |                                            |                                                                                                                                                                                                                                                                                                                     |
|-----|----------|------------------------------------------------------------------------------------------------------|--------------------------------------------|---------------------------------------------------------------------------------------------------------------------------------------------------------------------------------------------------------------------------------------------------------------------------------------------------------------------|
|     |          | Case Study in Neurosexism?                                                                           |                                            |                                                                                                                                                                                                                                                                                                                     |
| 129 | 11/12/13 | Gender and brains again? (Ugh)                                                                       | ronnerio                                   | <a href="http://ronnerio.com/2013/12/11/gender-and-brains-again-ugh/">http://ronnerio.com/2013/12/11/gender-and-brains-again-ugh/</a>                                                                                                                                                                               |
| 130 | 09/12/13 | Male and Female Brains... Again: Why Scientists Should Read Feminist Theory by Ángela Lavilla Cañedo | School of Languages and Cultures Postgrads | <a href="http://sheffieldslcblog.wordpress.com/2013/12/09/male-and-female-brains-again-why-scientists-should-read-feminist-theory-by-angela-lavilla-canedo/">http://sheffieldslcblog.wordpress.com/2013/12/09/male-and-female-brains-again-why-scientists-should-read-feminist-theory-by-angela-lavilla-canedo/</a> |
| 131 | 04/12/13 | Men and Women's Brains Are Wired Differently: Study                                                  | Medical Observer                           | <a href="http://medicalobserverph.com/men-and-womens-brains-are-wired-differently-study/">http://medicalobserverph.com/men-and-womens-brains-are-wired-differently-study/</a>                                                                                                                                       |
| 132 | 03/12/13 | Men Are from Mars, Women Are from Venus- striking differences in the neural wiring of men and women  | Interesting News From All Over             | <a href="http://interestingnewsfromallover.blogspot.co.uk/2013/12/new-evidencemen-are-from-mars-women-are.html">http://interestingnewsfromallover.blogspot.co.uk/2013/12/new-evidencemen-are-from-mars-women-are.html</a>                                                                                           |
| 133 | 26/12/13 | Does Islam Suggest Women are Inferior in Worth and Intellect?                                        | Citizen of Islam                           | <a href="http://www.citizenofislam.com/2013/12/does-islam-suggest-women-are-inferior.html">http://www.citizenofislam.com/2013/12/does-islam-suggest-women-are-inferior.html</a>                                                                                                                                     |
| 134 | 12/13    | Men, women's brains wired differently                                                                | IBN TV                                     | <a href="http://www.ibn-tv.com/2013/12/men-womens-brains-wired-differently/">http://www.ibn-tv.com/2013/12/men-womens-brains-wired-differently/</a>                                                                                                                                                                 |
| 135 | 12/12/13 | MALE BRAIN VERSUS FEMALE BRAIN (AND VICE VERSA)                                                      | Dome of Glass                              | <a href="http://domeofglass.com/2013/12/12/male-brain-versus-female-brain-and-vice-versa.aspx">http://domeofglass.com/2013/12/12/male-brain-versus-female-brain-and-vice-versa.aspx</a>                                                                                                                             |
| 136 | 03/12/13 | This just in... men and women are different                                                          | Brutally Honest                            | <a href="http://www.brutallyhonest.org/brutally_honest/2013/12/this-just-in-men-and-women-are-different.html">http://www.brutallyhonest.org/brutally_honest/2013/12/this-just-in-men-and-women-are-different.html</a>                                                                                               |
| 137 | 05/12/13 | Women brains and men brains                                                                          | Identifeye                                 | <a href="http://identifeye.wordpress.com/2013/12/05/women-brains-and-men-brains/">http://identifeye.wordpress.com/2013/12/05/women-brains-and-men-brains/</a>                                                                                                                                                       |
| 138 | 28/12/13 | Why it matters that men and women are different                                                      | The Matt Walsh Blog                        | <a href="http://themattwalshblog.com/2013/12/28/why-it-matters-that-men-and-women-are-different/">http://themattwalshblog.com/2013/12/28/why-it-matters-that-men-and-women-are-different/</a>                                                                                                                       |
| 139 | 10/12/13 | The Many Other Wonderful Words For "Brain"                                                           | Sparklife                                  | <a href="http://community.sparknotes.com/2013/12/10/the-many-other-wonderful-words-for-brain">http://community.sparknotes.com/2013/12/10/the-many-other-wonderful-words-for-brain</a>                                                                                                                               |
| 140 | 09/12/13 | We Shall Overcome                                                                                    | deshocks                                   | <a href="http://deshocks.com/2013/12/09/we-shall-overcome/">http://deshocks.com/2013/12/09/we-shall-overcome/</a>                                                                                                                                                                                                   |
| 141 | 10/12/13 | Brain Connectivity Study Reveals Striking                                                            | AANS Neurosurgeon                          | <a href="http://www.aansneurosurgeon.org/2013/12/10/brain-connectivity-study-reveals-striking-differences-between-the-sexes/">http://www.aansneurosurgeon.org/2013/12/10/brain-connectivity-study-reveals-striking-differences-between-the-sexes/</a>                                                               |

|     |          |                                                                                                                             |                                 |                                                                                                                                                                                                           |
|-----|----------|-----------------------------------------------------------------------------------------------------------------------------|---------------------------------|-----------------------------------------------------------------------------------------------------------------------------------------------------------------------------------------------------------|
|     |          | Differences Between the Sexes                                                                                               |                                 |                                                                                                                                                                                                           |
| 142 | 31/12/13 | Capitalism, Ecology And The Official Invisibility Of Women                                                                  | Popular Resistance              | <a href="http://www.popularresistance.org/capitalism-ecology-and-the-official-invisibility-of-women/">http://www.popularresistance.org/capitalism-ecology-and-the-official-invisibility-of-women/</a>     |
| 143 | 04/12/13 | SHOCK! HORROR! MEN AND WOMEN ARE DIFFERENT!                                                                                 | Father Ed Tomlinson's Blog      | <a href="http://www.tunbridgewells-ordinariate.com/blog/?p=9581">http://www.tunbridgewells-ordinariate.com/blog/?p=9581</a>                                                                               |
| 144 | 12/13    | Sex and brains: Vive la différence!                                                                                         | Life science log                | <a href="http://www.lifesciencelog.com/cluster2017399500/">http://www.lifesciencelog.com/cluster2017399500/</a>                                                                                           |
| 145 | 11/12/13 | Recent Studies Raise the Possibility That Male Brains Are Wired for Focus, Female Brains for Multitasking                   | San Diego Education Report Blog | <a href="http://learningboosters.blogspot.co.uk/2013/12/recent-studies-raise-possibility-that.html">http://learningboosters.blogspot.co.uk/2013/12/recent-studies-raise-possibility-that.html</a>         |
| 146 | 02/12/13 | Female brain is 'hard-wired' to be better at multi-tasking.                                                                 | collection                      | <a href="http://bbhazghy.blogspot.co.uk/2013/12/female-brain-is-hard-wired-to-be-better.html">http://bbhazghy.blogspot.co.uk/2013/12/female-brain-is-hard-wired-to-be-better.html</a>                     |
| 147 | 08/12/13 | "As hardy perennials go, there is little to beat that science hacks' favourite: the hard-wiring of male and female brains." | Althouse                        | <a href="http://althouse.blogspot.co.uk/2013/12/as-hardy-perennials-go-there-is-little.html">http://althouse.blogspot.co.uk/2013/12/as-hardy-perennials-go-there-is-little.html</a>                       |
| 148 | 26/12/13 | Girls' brain connections may explain their faster maturity                                                                  | Human Rights Observers          | <a href="https://hromedia.com/2013/12/26/girls-brain-connections-may-explain-their-faster-maturity/">https://hromedia.com/2013/12/26/girls-brain-connections-may-explain-their-faster-maturity/</a>       |
| 149 | 04/12/13 | Brains of Males and Females Are Wired Differently                                                                           | Web Pro News                    | <a href="http://www.webpronews.com/brains-of-males-and-females-are-wired-differently-2013-12">http://www.webpronews.com/brains-of-males-and-females-are-wired-differently-2013-12</a>                     |
| 150 | 12/12/13 | Brains of women, men are actually wired differently                                                                         | The Columbian                   | <a href="http://www.columbian.com/news/2013/dec/12/brains-of-women-men-are-actually-wired-differently/">http://www.columbian.com/news/2013/dec/12/brains-of-women-men-are-actually-wired-differently/</a> |
| 151 | 05/12/13 | Should women run the world?                                                                                                 | Bill Longstaff                  | <a href="http://blongstaff.blogspot.co.uk/2013/12/should-women-run-world.html">http://blongstaff.blogspot.co.uk/2013/12/should-women-run-world.html</a>                                                   |
| 152 | 04/12/13 | 'Men and women's brains are wired differently'                                                                              | The Morning News                | <a href="http://themorningnewsaruba.com/health/men-and-womens-brains-are-wired-differently/">http://themorningnewsaruba.com/health/men-and-womens-brains-are-wired-differently/</a>                       |

|     |          |                                                                                                    |                                              |                                                                                                                                                                                                                                                                                                                                                                 |
|-----|----------|----------------------------------------------------------------------------------------------------|----------------------------------------------|-----------------------------------------------------------------------------------------------------------------------------------------------------------------------------------------------------------------------------------------------------------------------------------------------------------------------------------------------------------------|
| 153 | 03/12/13 | Male And Female Brains Are Wired Differently, Alert The Feminists                                  | Chateau Heartiste                            | <a href="http://heartiste.wordpress.com/2013/12/03/male-and-female-brains-are-wired-differently-alert-the-feminists/">http://heartiste.wordpress.com/2013/12/03/male-and-female-brains-are-wired-differently-alert-the-feminists/</a>                                                                                                                           |
| 154 | 03/12/13 | The Science Is Settled: Feminism Is Wrong                                                          | The Other McCain                             | <a href="http://theothermccain.com/2013/12/03/the-science-is-settled-feminism-is-wrong/">http://theothermccain.com/2013/12/03/the-science-is-settled-feminism-is-wrong/</a>                                                                                                                                                                                     |
| 155 | 04/12/13 | People Are Still Saying This??                                                                     | Feminist Philosophers                        | <a href="http://feministphilosophers.wordpress.com/2013/12/04/people-are-still-saying-this/">http://feministphilosophers.wordpress.com/2013/12/04/people-are-still-saying-this/</a>                                                                                                                                                                             |
| 156 | 12/04/13 | Diffusion tensor imaging: girls, boys brains are different at all development stages               | California's Children                        | <a href="http://californiaschildren.typepad.com/californias-children/2013/12/diffusion-tensor-imaging-girls-boys-brains-are-different-at-all-development-stages.html#.UvO56fl_vYg">http://californiaschildren.typepad.com/californias-children/2013/12/diffusion-tensor-imaging-girls-boys-brains-are-different-at-all-development-stages.html#.UvO56fl_vYg</a> |
| 157 | 04/12/13 | Are men's and women's brains truly wired differently?                                              | NEWSFIX                                      | <a href="http://newsfixnow.com/2013/12/04/are-mens-and-womens-brains-truly-wired-differently/">http://newsfixnow.com/2013/12/04/are-mens-and-womens-brains-truly-wired-differently/</a>                                                                                                                                                                         |
| 158 | 06/12/13 | BRAIN ANALYSIS STUDY FINDS SIGNIFICANT DIFFERENCES BETWEEN THE GENDERS                             | rb.trends                                    | <a href="http://www.richardbanks.com/trends/2013/12/06/brain-analysis-study-finds-significant-differences-between-the-genders-brains/">http://www.richardbanks.com/trends/2013/12/06/brain-analysis-study-finds-significant-differences-between-the-genders-brains/</a>                                                                                         |
| 159 | 03/12/13 | A neurological explanation for gender stereotypes                                                  | current, medicine, ethics and my experiences | <a href="http://medblog.medlink-uk.net/haider302/2013/12/03/a-neurological-explanation-for-gender-stereotypes/">http://medblog.medlink-uk.net/haider302/2013/12/03/a-neurological-explanation-for-gender-stereotypes/</a>                                                                                                                                       |
| 160 | 03/12/13 | The Real Difference Between The Male And Female Brain                                              | FOOYOH                                       | <a href="http://fooyoh.com/iamchig_living_lifestyle/9370035/the-real-difference-between-the-male-and-female-brain">http://fooyoh.com/iamchig_living_lifestyle/9370035/the-real-difference-between-the-male-and-female-brain</a>                                                                                                                                 |
| 161 | 03/12/13 | New study just out - men's brains and women's brains really are wired up differently! Good or bad? | Lucy Melford                                 | <a href="http://lucymelford.blogspot.co.uk/2013/12/new-study-just-out-mens-brains-and.html">http://lucymelford.blogspot.co.uk/2013/12/new-study-just-out-mens-brains-and.html</a>                                                                                                                                                                               |
| 162 | 23/12/13 | Your at-a-glance guide to psychology in 2013 - Part 2                                              | BPS Research Digest                          | <a href="http://bps-research-digest.blogspot.co.uk/2013/12/your-at-a-glance-guide-to-psychology-in-23.html">http://bps-research-digest.blogspot.co.uk/2013/12/your-at-a-glance-guide-to-psychology-in-23.html</a>                                                                                                                                               |
